# Supplementary material for: Reversal of Triple-Negative Breast Cancer EMT by miR-200c Decreases Tryptophan Catabolism and a Program of Immunosuppression
Source: Oxford University Press journal article supplement (doi:10.1158/1541-7786.mcr-18-0246), 2018-09-13
Supplement: 15417786mcr180246-sup-198365_2_supp_5002249_prcrkp.xlsx [file 15417786mcr180246-sup-198365_2_supp_5002249_prcrkp.xlsx]

## Sheet: Sheet1
TABLE 2. Top 10 Enriched Pathways Upregulated Following miR-200c Restoration
CELL CYCLE	MELANOMA	HUNTINGTONS DISEASE		CITRATE CYCLE / TCA CYCLE	OXIDATIVE PHOSPHORYLATION	PARKINSONS DISEASE	ADHERENS JUNCTION	PHOSPHATIDYLINOSITOL SIGNALING SYSTEM	VALINE LEUCINE AND ISOLEUCINE DEGRADATION	GLYCEROPHOSPHOLIPID METABOLISM
SMC1B	CDH1	PLCB4	AP2S1	FH	COX15	PINK1	CDH1	CDS1	BCKDHB	CDS1
SFN	PDGFD	TFAM	PLCB3	IDH2	PPA2	SNCA	TGFBR2	PLCB4	ALDH6A1	PLA2G12A
WEE1	MITF	SLC25A4	NDUFB10	DLAT	ATP6V1A	SLC25A4	IGF1R	PIP4K2C	AUH	AGPAT9
ORC2	PDGFB	AP2B1	NDUFS4	DLD	COX11	UQCRFS1	MET	ITPK1	ACADSB	ETNK2
CCND1	IGF1R	ITPR1	TAF4B	SUCLA2	UQCRFS1	ATP5H	LMO7	PIK3C2A	MCCC2	MBOAT1
CDC26	PIK3CB	CREB3	AP2A2	MDH1	ATP5H	NDUFB5	TJP1	DGKE	HMGCL	DGKE
RB1	MET	UQCRFS1	COX4I1	IDH3A	NDUFB5	NDUFV2	MLLT4	PIK3CB	DBT	LPCAT2
CDK1	CCND1	ATP5H	COX6C	PC	NDUFV2	NDUFA5	WASF2	PLCE1	PCCA	DGKA
DBF4	RB1	NDUFB5	TBP	PCK2	COX17	UQCRB	CREBBP	DGKA	OXCT1	ETNK1
PTTG2	CDK6	POLR2K	POLR2C	OGDHL	ATP6V1H	CASP9	PARD3	ITPR1	DLD	DGKD
CDC25C	FGF10	NDUFV2	COX7A2L	ACO2	NDUFA5	COX6A2	TGFBR1	INPP4B	MCCC1	LPGAT1
CCNB2	PDGFC	NDUFA5	ATP5E	SDHD	UQCRB	NDUFA7	NLK	DGKD	BCAT1	GPD2
SKP2	FGF11	UQCRB	UQCRHL	SUCLG2	COX6A2	NDUFS1	SNAI1	INPP5B	BCAT2
BUB1	MDM2	CASP9	POLR2B	PDHA2	NDUFA7	ATP5D	PVRL2	PTEN	HIBCH
ORC4	FGF16	CREBBP	PPID	DLST	NDUFS1	COX5A	SSX2IP	INPP5K	HIBADH
CDC14A	PTEN	COX6A2	ATP5A1	PDHB	ATP5D	ATP5J	WASF1	ITPR3	MUT
CDKN1B	EGF	NDUFA7		SDHC	COX5A	NDUFS3	IQGAP1	IMPA2	ACADM
CDK6	AKT3	POLR2A			ATP5J	APAF1	CTNNA1		HADH
CDC25A	E2F2	NDUFS1			ATP6V1C1	UQCR10	FER
TTK		ATP5D			NDUFS3	NDUFA6	PTPRF
CCNH		HIP1			ATP6V1D	VDAC3	ACTN4
MDM2		COX5A			UQCR10	UBE2G1	EGFR
CDK7		RCOR1			NDUFA6	COX5B	TCF7L2
SMC3		ATP5J			ATP6V0D1	NDUFB3	INSR
TFDP2		HDAC2			COX5B	NDUFS6	WASL
ANAPC10		CASP8			NDUFB3	NDUFA1	MAPK1
ORC1		HDAC1			ATP6V1G3	UQCRC1	ACP1
PTTG1		CREB3L4			ATP6V1G1	NDUFB1
RBL2		NDUFS3			NDUFS6	COX7B
CCNA2		APAF1			NDUFA1	COX6A1
CREBBP		UQCR10			UQCRC1	UQCRC2
PRKDC		NDUFA6			NDUFB1	SDHD
E2F2		VDAC3			ATP6V0A1	ATP5O
CDC7		COX5B			COX7B	UBA1
HDAC2		NDUFB3			COX6A1	SDHC
PCNA		NDUFS6			PPA1	ATP5C1
TFDP1		NDUFA1			UQCRC2	NDUFA4L2
MCM4		HTT			SDHD	ATP5B
CCNA1		UQCRC1			ATP5O	UBB
HDAC1		NDUFB1			SDHC	UBE2L3
TGFB2		COX7B			ATP5C1	NDUFC1
YWHAZ		COX6A1			NDUFA4L2	NDUFAB1
MAD2L1		CLTC			ATP5B	NDUFB10
CDC20		UQCRC2			ATP5I	UCHL1
E2F4		POLR2J			NDUFC1	NDUFS4
STAG2		SDHD			NDUFAB1	GPR37
SKP1		SOD1			NDUFB10	COX4I1
CCNB1		ATP5O			NDUFS4	COX6C
MCM6		SDHC			COX4I1	COX7A2L
CDC14B		ATP5C1			COX6C	ATP5E
ESPL1		NDUFA4L2			COX7A2L	UQCRHL
CDKN2C		ATP5B			ATP5E	UBE2J1
CDC23		IFT57			UQCRHL	PPID
ORC6		DNAL1			ATP6V0E2	ATP5A1
E2F5		PLCB1			ATP5A1
MCM2		SIN3A
CUL1		CREB1
ORC3		GNAQ
ATM		NDUFC1
BUB3		NDUFAB1
